# Supplementary material for: Elimination of African Onchocerciasis: Modeling the Impact of Increasing the Frequency of Ivermectin Mass Treatment
Source: PubMed Central journal article supplement (PMC4278850; doi:10.1371/journal.pone.0115886), 2014-12-29

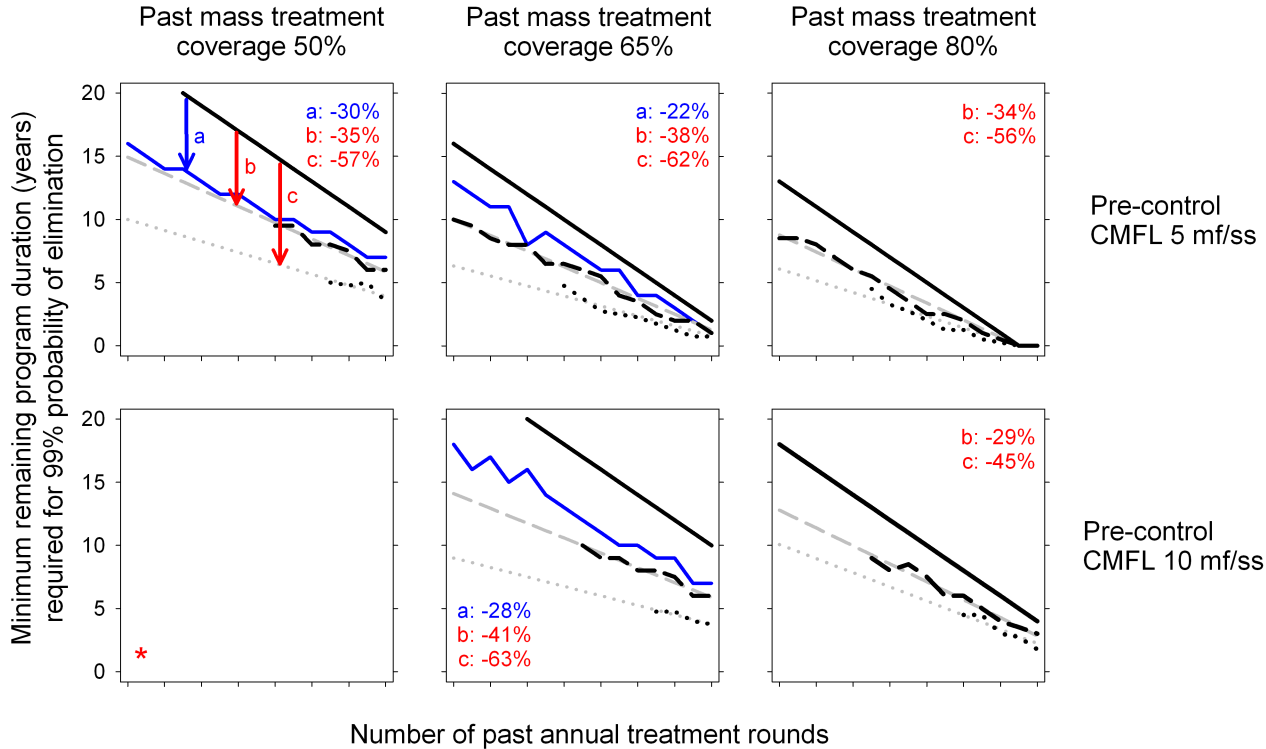

Supplement: pone.0115886.s004.pdf [file pone.0115886.s004.pdf]
