# Supplementary material for: Elimination of African Onchocerciasis: Modeling the Impact of Increasing the Frequency of Ivermectin Mass Treatment
Source: PubMed Central journal article supplement (PMC4278850; doi:10.1371/journal.pone.0115886), 2014-12-29
Supplement: pone.0115886.s005.pdf [file pone.0115886.s005.pdf]

Past mass treatment coverage 50%

Past mass treatment coverage 65%

Past mass treatment coverage 80%

Minimum remaining program duration (years) required for 99% probability of elimination

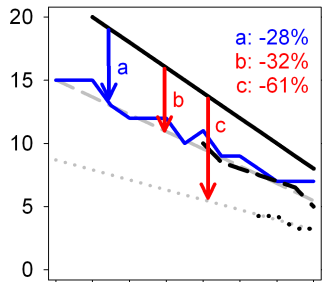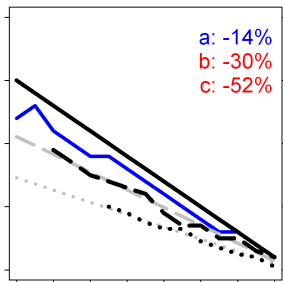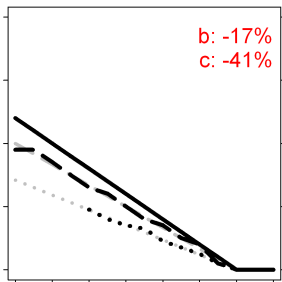

Pre-control  
CMFL 5 mf/ss

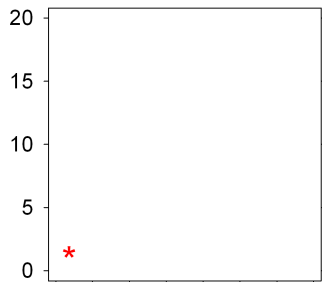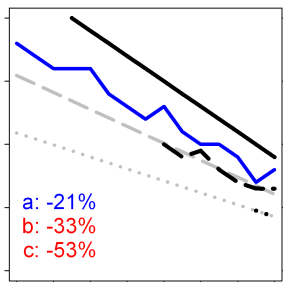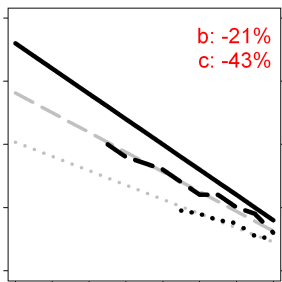

Pre-control  
CMFL 10 mf/ss

Number of past annual treatment rounds
